# Supplementary material for: Intramolecular N-coordination in ketiminoboranes
Source: Royal Society of Chemistry journal article supplement (doi:10.1039/c5dt00196j), 2015-01-01
Supplement: c5dt00196j1.pdf [file c5dt00196j1.pdf]

COMMUNICATION

Intramolecular N-coordination in ketiminoboranes

Cite this: DOI: 10.1039/x0xx00000x

Catherine E. Bacon,<sup>a</sup> Liz Mansour,<sup>b</sup> John J. Hayward,<sup>b</sup> and Jeremy M. Rawson\*<sup>b</sup>

Electronic Supplementary Information:

Experimental

General considerations

All experiments were performed under a nitrogen atmosphere unless stated otherwise. Dry solvents were distilled off sodium (THF, toluene, diethyl ether, hexane) or CaH<sub>2</sub> (acetonitrile, dichloromethane) for the preparation of **4a**·HCl and **4c**·HCl or from a solvent purification system (**4b**·BF<sub>3</sub>). All chemicals were commercially available and used as received. NMR spectra were recorded on a Bruker Avance III 400 MHz spectrometer or a Bruker Avance III 500 MHz spectrometer. <sup>11</sup>B NMR spectra were referenced to BF<sub>3</sub>·Et<sub>2</sub>O and <sup>19</sup>F NMR spectra referenced to CFCl<sub>3</sub>. Electron impact (EI) mass spectra were obtained using a KRATOS MS890 double focussing magnetic sector instrument; electrospray (ESI) spectra were recorded on a KRATOS Concept or Quattro LC mass spectrometer. Elemental analyses were carried out on an Exeter CE-440 Elemental Analyser.

Syntheses

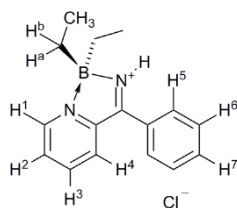

Preparation of **4a**·HCl·THF

A solution of Li[N(SiMe<sub>3</sub>)<sub>2</sub>] (0.452 g, 2.73 mmol) and 2-benzoylpyridine (0.500 g, 2.73 mmol) in PhMe (20 mL) was heated to 90 °C for 18 h. The solvent was removed *in vacuo* and the red residue redissolved in THF (25 mL). Me<sub>3</sub>SiCl (0.35 mL, 2.75 mmol) was added and the reaction mixture heated to 45 °C for 2 h. The reaction mixture was cooled to -78 °C, Et<sub>3</sub>BOMe (2.73 mL, 1.0 M in THF, 2.73 mmol) was added dropwise and the reaction allowed to slowly warm to room temperature. Colourless blocks grew from the solution over 3 d, isolated by filtration, washed with THF (2 × 10 mL) and dried *in vacuo* to give **4a**·HCl·THF as white hygroscopic crystals. Yield: 0.350 g, 37%.

<sup>1</sup>H NMR (500 MHz, CDCl<sub>3</sub>, ppm) δ<sub>H</sub> = 16.3 (1H, br s, NH), 9.77 (1H, d, J = 5.5 Hz, H<sup>a</sup>), 8.70 (1H, t, J = 7.9 Hz, H<sup>b</sup>), 8.58 (1H, d, J = 8.1 Hz, H<sup>c</sup>), 8.28 (1H, t, J = 6.6 Hz, H<sup>d</sup>), 8.16 (2H, d, J = 7.3 Hz, 2×H<sup>e</sup>), 7.68 (1H, tt, J = 7.4,

1.5 Hz, H<sup>f</sup>), 7.61 (2H, t, J = 7.9 Hz, 2×H<sup>g</sup>), 1.07 (2H, dq, J = 15.3, 7.7 Hz, 2×BCH<sup>a</sup>H<sup>b</sup>CH<sub>3</sub>), 0.79 (2H, dq, J = 15.3, 7.7 Hz, 2×BCH<sup>a</sup>H<sup>b</sup>CH<sub>3</sub>), 0.49 (6H, t, J = 7.7 Hz, 2×BCH<sub>2</sub>CH<sub>3</sub>). <sup>13</sup>C NMR (100 MHz, CDCl<sub>3</sub>, ppm) δ<sub>C</sub> = 165.40, 146.24, 143.28, 142.88, 134.21, 130.08, 129.72, 128.90, 126.49, 126.35, 14.45, 8.54. <sup>11</sup>B{<sup>1</sup>H} NMR (100 MHz, CDCl<sub>3</sub>, ppm) δ<sub>B</sub> = 8 (s). **Elemental analysis** found C 62.4, H 7.1, N 9.0%. Calc. for C<sub>15</sub>H<sub>18</sub>N<sub>3</sub>B·HCl·1.15H<sub>2</sub>O C 62.5, H 7.3, N 9.1%. **MS (ESI+)** m/z = 250.17 (23%), 251.17 (100%), 252.17 (18%) [M+H]<sup>+</sup>

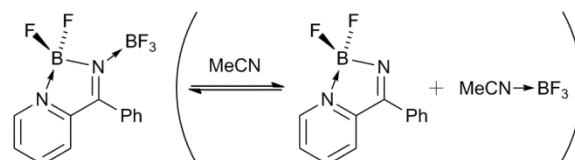

Preparation of **4b**·BF<sub>3</sub>

A solution of Li[N(SiMe<sub>3</sub>)<sub>2</sub>] (0.837 g, 5.00 mmol) and 2-benzoylpyridine (0.916 g, 5.00 mmol) were heated in PhMe (40 mL) at 90 °C for 18 h to afford a dark red solution. The solvent was removed *in vacuo* and the red residue redissolved in THF (50 mL). Me<sub>3</sub>SiCl (0.543 g, 5.00 mmol) was added and the reaction mixture heated to 45 °C for 2 h to afford a yellow-orange solution. The reaction mixture was cooled to -78 °C, BF<sub>3</sub>·Et<sub>2</sub>O (1.23 mL, 10 mmol) was added dropwise and the reaction allowed to slowly warm to room temperature. Colourless blocks formed on standing for 3 d which were isolated by filtration and dried *in vacuo* to give **4b**·BF<sub>3</sub> as white crystals. Yield: 0.910 g, 3.06 mmol, 61%.

<sup>11</sup>B and <sup>19</sup>F NMR data are consistent with the presence of an equilibrium between **4b**·BF<sub>3</sub> and **4b** and BF<sub>3</sub>·MeCN in solution. NMR are shown below for this system (Fig. ESI-1). Both the <sup>1</sup>H and <sup>13</sup>C NMR spectra are significantly complicated by the presence of a mixture of these two different components in solution, resulting in multiple overlapping signals which were not assigned.

<sup>11</sup>B{<sup>1</sup>H} NMR (160 MHz, CD<sub>3</sub>CN, ppm) δ<sub>B</sub> = 8 (t, BF<sub>2</sub>, <sup>1</sup>J<sub>BF</sub> = 25.4 Hz), 6 (t, BF<sub>2</sub>, <sup>1</sup>J<sub>BF</sub> = 22.8 Hz), 1 (q, BF<sub>3</sub>, <sup>1</sup>J<sub>BF</sub> = 14.5 Hz), 0 (s, BF<sub>3</sub>·MeCN). <sup>19</sup>F NMR (471 MHz, CD<sub>3</sub>CN, ppm) δ<sub>F</sub> = -141.5 (q, BF<sub>3</sub>, <sup>1</sup>J<sub>BF</sub> = 14.5 Hz), -151.9 (s, BF<sub>3</sub>), -159.5 (q, BF<sub>2</sub>, 25.0 Hz), -159.2 (q, BF<sub>2</sub>, 22.5 Hz). **Elemental analysis** found C 48.2, H 3.8, N 8.5%. Calc. for C<sub>12</sub>H<sub>9</sub>N<sub>3</sub>B<sub>2</sub>F<sub>5</sub> C 48.4, H 3.0, N 9.4%.

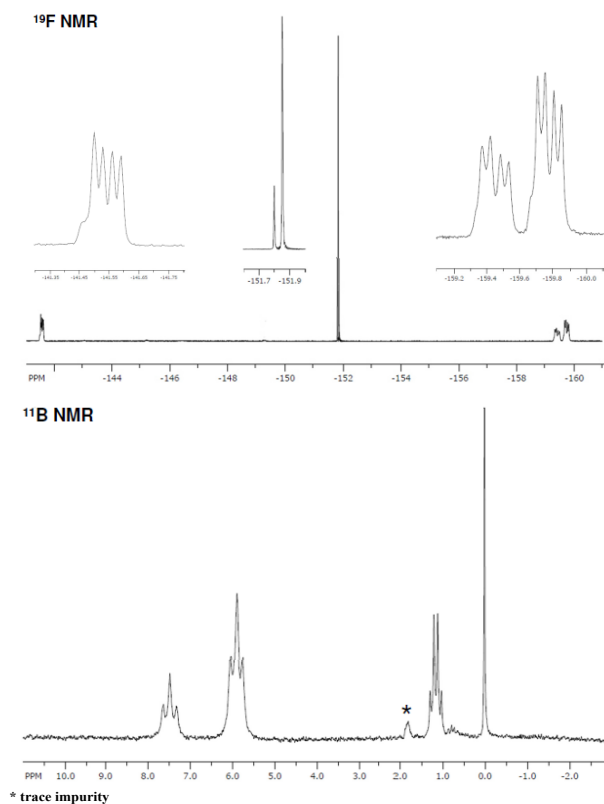

Fig. ESI-1  $^{19}\text{F}$  NMR (top) and  $^{11}\text{B}$  NMR (bottom) of **4b**-BF<sub>3</sub> in MeCN

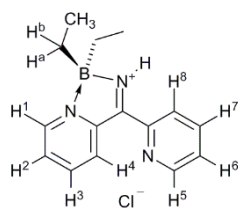

### Preparation of **4c**-HCl·THF

A solution of lithium *bis*(trimethylsilyl)amide (0.426 g, 2.55 mmol) and 2,2'-dipyridyl ketone (0.500 g, 2.55 mmol) in PhMe (20 mL) and heated to 90 °C for 18 h. The solvent was removed *in vacuo* and the red residue redissolved in THF (20 mL). Me<sub>3</sub>SiCl (0.33 mL, 2.6 mmol) was added and the reaction mixture heated to 40 °C for 2 h. The reaction mixture was cooled to -78 °C and Et<sub>3</sub>BOMe (2.55 mL, 1.0 M in THF, 2.55 mmol) was added dropwise. The reaction was allowed to slowly warm to room temperature to give a pale brown precipitate under a dark brown liquid. The reaction mixture was filtered and colourless crystals grew from the filtrate over a period of 3 d. Yield: 0.252 g, 27%.

$^1\text{H}$  NMR (500 MHz, CDCl<sub>3</sub>, ppm)  $\delta_{\text{H}}$  = 16.3 (1H, br s, NH), 9.77 (1H, d,  $J$  = 8.2 Hz, H<sup>a</sup>), 9.69 (1H, d,  $J$  = 8.0 Hz, H<sup>b</sup>), 8.84 (1H, dm,  $J$  = 4.3 Hz, H<sup>c</sup>), 8.69 (1H, d,  $J$  = 5.6 Hz, H<sup>d</sup>), 8.49 (1H, td,  $J$  = 7.7, 1.38 Hz, H<sup>e</sup>), 8.10 (2H, m, H<sup>f</sup> & H<sup>g</sup>), 7.63 (1H, ddd,  $J$  = 7.7, 4.8, 1.0 Hz, H<sup>h</sup>), 1.20 (2H, dq,  $J$  = 15.3, 7.7 Hz, BCH<sup>a</sup>H<sup>b</sup>CH<sub>3</sub>), 0.88 (2H, dq,  $J$  = 15.3, 7.7 Hz, BCH<sup>a</sup>H<sup>b</sup>CH<sub>3</sub>), 0.54 (6H, t,  $J$  = 7.7 Hz, BCH<sub>2</sub>CH<sub>3</sub>).  $^{11}\text{B}\{^1\text{H}\}$  NMR (100 MHz, CDCl<sub>3</sub>, CDCl<sub>3</sub>, ppm)  $\delta_{\text{B}}$  = 8 (s). **Elemental analysis** (%): Found C 63.4, H 7.6, N 11.9%. Calc. for C<sub>15</sub>H<sub>18</sub>BN<sub>3</sub>·HCl·0.9C<sub>4</sub>H<sub>8</sub>O C 63.4, H 7.5, N 11.9%.

### Crystallography

Single crystals of **4a**-HCl·THF and **4c**-HCl·THF were mounted on glass fibres using fluoropolymer and examined on a Nonius Kappa CCD diffractometer using Mo-K $\alpha$  radiation (graphite monochromator,  $\lambda$  = 0.71073 Å). Temperatures were maintained using an Oxford Cryostream cooler. For compound **4a**-HCl·THF the crystals underwent a phase transition upon cooling to 180 K and data were collected at 240(2) K whereas **4c**-HCl·THF was collected at 180(2) K. Data collections were made using  $\omega$  and  $\phi$  scans using COLLECT.<sup>1</sup> Cells were indexed using HKL Scalepack and reduced using HKL, Denzo and Scalepack.<sup>2</sup> Data were corrected for absorption using symmetry equivalent reflections using the method of Blessing.<sup>3</sup> A crystal of **4b**-BF<sub>3</sub> was mounted in paratone oil in a cryoloop and examined on a Bruker APEX CCD detector using Mo-K $\alpha$  radiation at 173(2) K with temperatures maintained using an Oxford Cryostream cooler. Data were collected using SMART software,<sup>4</sup> reduced using SAINT,<sup>5</sup> and an absorption correction applied using SADABS.<sup>6</sup> Structures were solved using SHELXS-97 and refined using full matrix least squares methods on  $F^2$  using SHELXL-97.<sup>7</sup> The structure of **4c**-HCl·THF crystallised in the acentric space group P2<sub>1</sub>. Although the Flack parameter indicated possible merohedral twinning, there are two molecules in the asymmetric unit related via a non-crystallographic inversion centre (the molecules differ primarily in the orientation of the pyridyl groups on the cyclic backbone, Fig. ESI-2). Thus the crystal inherently comprises an equal mixture of both left- and right-handed isomers. Since the final R values were acceptable and the refinement clearly reveals that the structure containing both 'hands' in a 1:1 ratio no attempt was made to resolve the twin since determination of the absolute structure is of limited chemical meaning. Figures for publication were prepared using Mercury version 3.3.<sup>8</sup> A summary of crystallographic data is presented in Table ESI-1 and the final structures available in crystallographic cif format. CCDC deposit numbers 1043411-1043413.

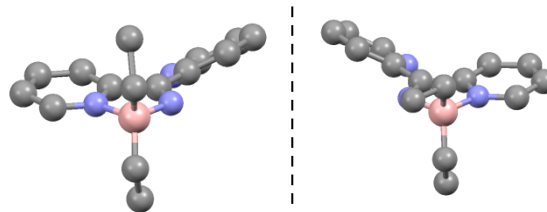

Fig. ESI-2 The two crystallographically independent molecules of **4c** in the asymmetric unit, illustrating the non-crystallographic mirror plane.

### Computational studies

Single point and geometry-optimised DFT calculations were undertaken on the structure of **4b**-BF<sub>3</sub> as determined by X-ray diffraction using the Pople 6-311G\* triple zeta basis set<sup>9</sup> and the B3LYP functional<sup>10</sup> within Jaguar.<sup>11</sup> Geometry optimisations were performed with bond elongation constraints along the N-BF<sub>3</sub> vector in 0.2 Å increments but failed to reveal a transition state. The  $pK_{\text{b}}$  of **4c** was determined from the value derived using the quantum mechanical  $pK_{\text{a}}$  prediction module in Jaguar based on **4c**-H<sup>+</sup> in water. NBO analysis was undertaken on **4b**-BF<sub>3</sub> and revealed strong polarisation of the B-N bonds in the sense B<sup>δ+</sup>-N<sup>δ-</sup> in accord with electronegativity differences between B and N. The NBO analysis

revealed significant delocalisation and both the partial charges and formal NBO bond orders in the bicyclic core are shown in ESI Fig. 3.

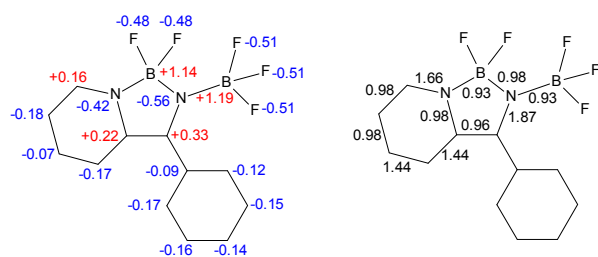

Fig. ESI-3 NBO charges (left) and bond orders (right) for **4b**·BF<sub>3</sub>

## References

- COLLECT, Nonius BV, Delft, The Netherlands
- Z. Otwinowski and W. Minor, *Methods in Enzymology: Macromolecular Crystallography, Part A*, 1997, **276**, 307.
- R.H. Blessing, *Cryst. Rev.*, 1987, **1**, 3. (b) R. H. Blessing and D. A. Langa, *J. Appl. Crystallogr.*, 1987, **20**, 427.
- Bruker SMART, Bruker AXS, Madison, WI, USA.
- Bruker SAINT, Bruker AXS, Madison, WI, USA.
- Bruker SADABS, Bruker AXS, Madison, WI, USA.
- SHELXS/SHELXL, G.M. Sheldrick, *Acta Cryst.*, 2008, **A64**, 112.
- Mercury v.3.3, Build RC5, Cambridge Crystallographic Data Centre. <http://www.ccdc.cam.ac.uk/mercury>.
- K. Raghavachari, J.S. Binkley, R. Seeger and J.A. Pople, *J. Chem. Phys.*, 1980, **72**, 650.
- C. Lee, W. Yang and R.G. Parr, *Phys. Rev. B.*, 1988, **37**, 785.
- Jaguar v.8.5; Schrödinger LLC, New York, NY, 2014. <http://www.schrodinger.com>

Table ESI-1 Crystal data for compounds **4a**·HCl·THF, **4b**·BF<sub>3</sub> and **4c**·HCl·THF

|                                                                          | <b>4a</b> ·HCl·THF                                                                  | <b>4b</b> ·BF <sub>3</sub>                                                  | <b>4c</b> ·HCl·THF                                                                  |
|--------------------------------------------------------------------------|-------------------------------------------------------------------------------------|-----------------------------------------------------------------------------|-------------------------------------------------------------------------------------|
| Formula                                                                  | C <sub>16</sub> H <sub>20</sub> BN <sub>2</sub> ·C <sub>4</sub> H <sub>8</sub> O·Cl | C <sub>12</sub> H <sub>9</sub> B <sub>2</sub> F <sub>3</sub> N <sub>2</sub> | C <sub>15</sub> H <sub>19</sub> BN <sub>3</sub> ·C <sub>4</sub> H <sub>8</sub> O·Cl |
| FW                                                                       | 358.70                                                                              | 297.83                                                                      | 359.71                                                                              |
| Temp. (K)                                                                | 240(2)                                                                              | 173(2)                                                                      | 180(2)                                                                              |
| Crystal system                                                           | Monoclinic                                                                          | Orthorhombic                                                                | Monoclinic                                                                          |
| Space group                                                              | <i>P2<sub>1</sub>/c</i>                                                             | <i>Pbca</i>                                                                 | <i>P2<sub>1</sub></i>                                                               |
| <i>a</i> /Å                                                              | 9.2150(2)                                                                           | 9.934(3)                                                                    | 9.38350(10)                                                                         |
| <i>b</i> /Å                                                              | 13.4773(3)                                                                          | 12.290(4)                                                                   | 12.8596(3)                                                                          |
| <i>c</i> /Å                                                              | 17.1221(4)                                                                          | 21.001(7)                                                                   | 16.6196(3)                                                                          |
| <i>α</i> /°                                                              | 90.00                                                                               | 90.00                                                                       | 90.00                                                                               |
| <i>β</i> /°                                                              | 97.697(2)                                                                           | 90.00                                                                       | 99.1807(12)                                                                         |
| <i>γ</i> /°                                                              | 90.00                                                                               | 90.00                                                                       | 90.00                                                                               |
| <i>V</i> /Å <sup>3</sup>                                                 | 2107.29(8)                                                                          | 2564.0(14)                                                                  | 1979.77(6)                                                                          |
| <i>Z</i>                                                                 | 4                                                                                   | 8                                                                           | 4                                                                                   |
| <i>D<sub>c</sub></i> /Mg m <sup>-3</sup>                                 | 1.131                                                                               | 1.543                                                                       | 1.207                                                                               |
| <i>μ</i> (Mo-Kα)/cm <sup>-1</sup>                                        | 0.191                                                                               | 0.142                                                                       | 0.204                                                                               |
| Total reflections                                                        | 21422                                                                               | 25423                                                                       | 25481                                                                               |
| Unique Reflections                                                       | 6052                                                                                | 2957                                                                        | 7194                                                                                |
| Reflns [ <i>I</i> >2σ( <i>I</i> )]                                       | 3359                                                                                | 2480                                                                        | 6037                                                                                |
| <i>θ</i> range                                                           | 3.76 ≤ <i>θ</i> ≤ 29.98                                                             | 1.94 ≤ <i>θ</i> ≤ 27.88                                                     | 2.69 ≤ <i>θ</i> ≤ 26.37                                                             |
| <i>R</i> <sub>int</sub>                                                  | 0.055                                                                               | 0.052                                                                       | 0.051                                                                               |
| <i>R</i> <sub>1</sub> <sup>a</sup> , <i>wR</i> <sub>2</sub> <sup>b</sup> | 0.093, 0.179                                                                        | 0.048, 0.139                                                                | 0.045, 0.106                                                                        |
| Residual <i>e</i> /Å <sup>3</sup>                                        | +0.50/-0.48                                                                         | +0.49/-0.20                                                                 | +0.30/-0.34                                                                         |
